# Supplementary material
Source: HighWire-hosted journal article supplement (https://diabetes.diabetesjournals.org/content/suppl/2005/11/28/54.12.3573)
Supplement: pg3573OnlineAppendix.pdf [file pg3573OnlineAppendix.pdf]

## Online Appendix

Table A1: *NIDDM1* region polymorphisms included in the analyses.

| Pop | ref SNP /<br>dbSNP | UCSNP | NCBI<br>Build 35 | Minor allele frequency |                     |                      |                     |
|-----|--------------------|-------|------------------|------------------------|---------------------|----------------------|---------------------|
|     |                    |       |                  | Mexican<br>American    | African<br>American | European<br>American | Chinese<br>American |
| Set | ID                 | No.   | Position         |                        |                     |                      |                     |
|     | rs3792083          |       | 240674894        | 0.293                  |                     |                      |                     |
|     | rs1866646          |       | 240790230        | 0.302                  |                     |                      |                     |
|     |                    | 123   | 241121729        | 0.149                  |                     |                      |                     |
|     |                    | 20    | 241122619        | 0.156                  |                     |                      |                     |
|     |                    | 125   | 241125352        | 0.391                  |                     |                      |                     |
|     |                    | 126   | 241125479        | 0.383                  |                     |                      |                     |
|     | rs11682315         |       | 241153861        | 0.714                  |                     |                      |                     |
|     | hCV25935839        |       | 241183585        | 0.176                  |                     |                      |                     |
| 1   | rs2975769          |       | 241232039        | 0.309                  | 0.183               | 0.305                | 0.350               |
|     |                    | 131   | 241232468        | 0.228                  |                     |                      |                     |
|     | rs2953145          | 118   | 241235586        | 0.128                  |                     |                      |                     |
|     | rs2975794          | 120   | 241235803        | 0.125                  |                     |                      |                     |
|     | rs3792267          | 43    | 241251164        | 0.234                  |                     |                      |                     |
| 2   | rs2975762          | 56    | 241251727        | 0.426                  | 0.280               | 0.412                | 0.362               |
|     | rs3792272          | 59    | 241252330        | 0.439                  |                     |                      |                     |
| 3   | rs3842570          | 19R   | 241254283        | 0.571                  | 0.297               | 0.432                | 0.354               |
|     | rs2953171          | 109   | 241256043        | 0.234                  |                     |                      |                     |
| 4   | rs3749166          | 48    | 241257411        | 0.438                  | 0.297               | 0.432                | 0.354               |
|     | rs2975767          |       | 241258219        | 0.271                  |                     |                      |                     |
| 5   | rs4352228          | 30    | 241261426        | 0.307                  | 0.290               | 0.434                | 0.346               |

|    |            |    |           |       |       |       |       |
|----|------------|----|-----------|-------|-------|-------|-------|
| 6  | rs10933619 | 67 | 241261882 | 0.218 | 0.141 | 0.259 | 0.466 |
|    | rs4676418  | 68 | 241261901 | 0.207 |       |       |       |
|    | rs4676417  | 69 | 241261905 | 0.379 |       |       |       |
|    | rs11683918 | 70 | 241261989 | 0.556 |       |       |       |
|    | rs7594981  | 62 | 241262427 | 0.183 |       |       |       |
|    | rs5030952  | 63 | 241262693 | 0.236 |       |       |       |
| 7  | rs10933620 | 65 | 241269836 | 0.410 | 0.371 | 0.440 | 0.349 |
|    | rs7571442  | 32 | 241275981 | 0.255 |       |       |       |
| 8  | rs6437353  | 42 | 241278387 | 0.538 | 0.269 | 0.490 | 0.384 |
|    |            | 55 | 241280677 | 0.595 |       |       |       |
| 9  | rs4234122  | 54 | 241280698 | 0.292 | 0.466 | 0.313 | 0.461 |
|    | rs2975777  | 25 | 241281813 | 0.442 |       |       |       |
|    | rs11678793 | 23 | 241282095 | 0.802 |       |       |       |
| 10 | rs2953152  | 22 | 241282108 | 0.449 | 0.243 | 0.471 | 0.448 |
|    | rs4676410  | 39 | 241283729 | 0.346 |       |       |       |
|    | rs12477906 | 41 | 241286861 | 0.268 |       |       |       |
|    |            | 36 | 241288595 | 0.149 |       |       |       |
|    | rs2953155  | 37 | 241288621 | 0.450 |       |       |       |
|    | rs2975784  | 49 | 241289029 | 0.835 |       |       |       |
|    | rs2975785  | 52 | 241289319 | 0.553 |       |       |       |
|    | rs3749171  | 53 | 241289682 | 0.127 |       |       |       |
| 11 | rs3749172  | 38 | 241290239 | 0.444 | 0.248 | 0.473 | 0.311 |
|    | rs2975786  | 40 | 241290381 | 0.219 |       |       |       |
|    | rs6437354  | 35 | 241292685 | 0.231 |       |       |       |
| 12 |            | 34 | 241297975 | 0.207 | 0.454 | 0.319 | 0.303 |
|    |            | 31 | 241301761 | 0.153 |       |       |       |
|    |            | 33 | 241307923 | 0.146 |       |       |       |
|    |            | 29 | 241352371 | 0.191 |       |       |       |

|            |     |           |       |
|------------|-----|-----------|-------|
|            | 28  | 241352390 | 0.583 |
|            | 27  | 241352393 | 0.137 |
| rs3732341  |     | 241375534 | 0.404 |
| rs2043252  |     | 241383009 | 0.478 |
| rs4414678  | 3   | 241400623 | 0.479 |
| rs1013225  | 2   | 241400634 | 0.155 |
|            | 1   | 241400792 | 0.426 |
| rs2288745  |     | 241448833 | 0.390 |
| rs10182575 | 21  | 241526680 | 0.549 |
| rs6754171  |     | 241616003 | 0.399 |
|            | 17  | 241662239 | 0.258 |
|            | 18  | 241696608 | 0.208 |
| rs12694993 | 13  | 241734354 | 0.445 |
| rs6147253  | 14R | 241752822 | 0.379 |
| rs1470414  | 10  | 241797486 | 0.284 |
| rs1470413  | 11  | 241797675 | 0.251 |
|            | 12  | 241819018 | 0.263 |
| rs10153800 | 16  | 241899124 | 0.187 |
|            | 8   | 241995569 | 0.129 |
|            | 9   | 241995934 | 0.257 |
| rs2286277  | 7   | 242138352 | 0.247 |
